# Supplementary material
Source: publisher figshare collection journal article supplement (https://tandf.figshare.com/articles/dataset/_/1017336)
Supplement: Supplementary file 1 [file 2]

Journal of Vertebrate Paleontology

A new acaremyid rodent (Caviomorpha, Octodontoidea) from Scarritt Pocket, Deseadan (late Oligocene) of Patagonia (Argentina)

MARÍA G. VUCETICH<sup>\*,1</sup> MARÍA E. PÉREZ,<sup>2</sup> MARTÍN R. CIANCIO,<sup>1</sup> ALFREDO A. CARLINI,<sup>1</sup> RICHARD, H. MADDEN,<sup>3</sup> and MATTHEW J. KOHN<sup>4</sup>

<sup>1</sup>CONICET, Facultad de Ciencias Naturales y Museo, Universidad Nacional de La Plata. Paseo del Bosque s/n, B1900FWA La Plata, Argentina, [vucetich@fcnym.unlp.edu.ar](mailto:vucetich@fcnym.unlp.edu.ar);

<sup>2</sup>CONICET, Museo Paleontológico "Egidio Feruglio", Avenida Fontana 140, U9100GYO, Trelew, Chubut, Argentina;

<sup>3</sup>Department of Organismal Biology and Anatomy, University of Chicago, 1027 East 57th Street Chicago IL 60637-1508, U.S.A.;

<sup>4</sup>Department of Geosciences, Boise State University, Boise, ID 83725, U.S.A.

CHARACTER LIST S1. Morphological character list based on the dataset of Vucetich & Kramarz (2003). The following multistate characters are treated as ordered: 1, 6, 14 and 15.

- (1) Degree of hypsodonty: brachyodont (0); slightly hypsodont (1); mesodont (2); protohypsodont (3); euhypsodont (4).
- (2) Cusps differentiable from respective crests: yes (0); no (1).
- (3) Figure eight shaped lower cheek teeth: absent (0); present (1).
- (4) Crests obliquity in lower teeth: no (0); yes (1).
- (5) Deciduous premolar: normal replacement (0); retained (4).
- (6) Hypoflexus in the upper premolar: absent or incipient (0); poorly developed (1); well developed (2).
- (7) Number of crest of upper premolar: trilophodont (0); tetralophodont (1).
- (8) Quadrangular protocone area in M1-M2: no (0); yes (1).
- (9) Flexid on the anterior wall of the p4: present (0); absent (1).
- (10) Development of metalophulid II in the p4: short (0); long (1).
- (11) Lingual end of metalophulid II in p4: free (0); join to the metaconid (1); join to the metalophulid I.
- (12) Ectolophid length in p4: long (0); short (1).
- (13) Hypolophid in p4 in intermediate ontogenetic stage: absent or incipient (0); well developed (1).

- (14) Development of the metalophulid II in m1: reaching the lingual wall (0); not reaching the lingual wall (1); absent (2).
- (15) Development of the metalophulid II in m2: reaching the lingual wall (0); no reaching the lingual wall (1); absent (0).
- (16) Length of the posterolophid in m1-m2: short (0); long (1).
- (17) Orientation of nMpi: oblique AD-PV (0); horizontal (1); oblique AV-PD (2).
- (18) Anterodorsal limit of the mandibular masseteric fossa: absent (0); present (1).
- (19) Mental foramen: present (0); absent (1).
- (20) Figure eight shaped upper cheek teeth: absent (0); present (1).
- (21) AP-L of anterior lobe in m2 with respect to AP-L of posterior lobe: subequal (0); about 75% (1); less than 50% (2).
- (22) Origin of metalophulid II in m1: from protoconid (0); begin the protoconid (1).
- (23) Origin of metalophulid II in m2: from protoconid (0); begin the protoconid (1).
- (24) Discontinuity between the masseteric crest and the nMpi: absent (0); present (1).

MATRIX S1. Character-taxon matrix used for phylogenetic analysis. Characters between brackets represent polymorphic or uncertain scorings.

| Taxon                            | 10              | 20                  | 24    |
|----------------------------------|-----------------|---------------------|-------|
| <i>Phiomys andrewsi</i>          | 0000000010      | 2001010000          | 0110  |
| <i>Deseadomys arambourgi</i>     | 1101000100      | 00011 [01] 0000     | 1110  |
| <i>Platypittamys brachyodon</i>  | 0000000100      | 0000 [01] 00000     | 1110  |
| <i>Migraveramus beatus</i>       | 11000???11      | 0110 [01] 1000?     | 0000  |
| <i>Galileomys antelucanus</i>    | 101001 [01] 001 | 1001100101          | 1110  |
| <i>Acaremys murinus</i>          | 101001 [01] 000 | 0000110101          | 1110  |
| <i>Sciamys principalis</i>       | 2110021001      | 1000011101          | 1110  |
| <i>Protacaremys prior</i>        | 10001???1??     | ???0011000          | 0110  |
| <i>Chasichimys bonaerense</i>    | 31111???0??     | ???221101?          | 2???1 |
| <i>Chasicomys octodontiforme</i> | 31101???0??     | ???221?011          | 2???1 |
| <i>Octomys mimax</i>             | 41111???0??     | ???2212011          | 0???1 |
| <i>Massoiomys obliquus</i>       | 21111???0??     | ???2210010          | 2???0 |
| <i>Eumysops laeviplicatus</i>    | 21001???0??     | ???2210010          | 2???0 |
| <i>Stichomys regularis</i>       | 21011???1??     | ??? [12] [12] 10000 | 20?0  |
| <i>Changquin woodi</i>           | 2110??????      | ???00101??          | 0110  |
| <i>Draconomys verai</i>          | 01000??111      | 0111110100          | 0000  |
| <i>Sallamys pascuali</i>         | 100000 [01] 100 | 0010010000          | 1000  |
| <i>Prospaniomys priscus</i>      | 11011???0??     | ???1100000          | 0000  |
| <i>Spaniomys riparius</i>        | 21011???0??     | ???0001000          | 0000  |
| <i>Willidewu steparius</i>       | 1000000010      | 0111111000          | 2000  |
