# Supplementary material
Source: publisher figshare collection journal article supplement (https://tandf.figshare.com/articles/dataset/_/1017336)
Supplement: Supplementary file 2 [file 2]

Journal of Vertebrate Paleontology

A new acaremyid rodent (Caviomorpha, Octodontoidea) from Scarritt Pocket, Deseadan (late Oligocene) of Patagonia (Argentina)

MARÍA G. VUCETICH,<sup>\*,1</sup> MARÍA E. PÉREZ,<sup>2</sup> MARTÍN R. CIANCIO,<sup>1</sup> ALFREDO A. CARLINI,<sup>1</sup> RICHARD, H. MADDEN,<sup>3</sup> and MATTHEW J. KOHN<sup>4</sup>

<sup>1</sup>CONICET, Facultad de Ciencias Naturales y Museo, Universidad Nacional de La Plata. Paseo del Bosque s/n, B1900FWA La Plata, Argentina, vucetich@fcnym.unlp.edu.ar;

<sup>2</sup>CONICET, Museo Paleontológico "Egidio Feruglio", Avenida Fontana 140, U9100GYO, Trelew, Chubut, Argentina;

<sup>3</sup>Department of Organismal Biology and Anatomy, University of Chicago, 1027 East 57th Street Chicago IL 60637-1508, U.S.A.;

<sup>4</sup>Department of Geosciences, Boise State University, Boise, ID 83725, U.S.A.

## ANALYTICAL METHODS

Zircon was separated using standard techniques, mounted in epoxy, polished until the centers of the grains were exposed, and imaged with cathodoluminescence (CL). U-Pb isotope systematics and trace element compositions were analyzed by laser ablation inductively coupled plasma mass spectrometry (LA-ICPMS) using a ThermoElectron X-Series II quadrupole ICPMS and New Wave Research UP-213 Nd:YAG UV (213 nm) laser ablation system. Analysis spots were placed in homogenous CL domains and not on visible cracks or inclusions. In-house analytical protocols, standard materials, and data reduction software were used for acquisition and calibration of U-Pb dates and a suite of high field strength elements (HFSE) and rare earth elements (REE) using the high sensitivity and unique properties of the interface (Xs cones), extraction lens, and quadrupole analyzer of the X-Series II. Zircon was ablated with a laser spot of 30  $\mu\text{m}$  wide using fluence and pulse rates of 5  $\text{J}/\text{cm}^2$  and 10 Hz, respectively, during a 60 second analysis (15 sec gas blank, 45 sec ablation) that excavated a pit  $\sim 25 \mu\text{m}$  deep. Ablated material was carried by a 1.2 L/min He gas stream to the nebulizer flow of the plasma. Dwell times were 5 ms for Si and Zr; 100 ms for  $^{49}\text{Ti}$  and  $^{207}\text{Pb}$ , 40 ms for  $^{238}\text{U}$ ,  $^{232}\text{Th}$ ,  $^{202}\text{Hg}$ ,  $^{204}\text{Pb}$ ,  $^{206}\text{Pb}$  and  $^{208}\text{Pb}$  isotopes; and 10 ms all other HFSE and REE. Background count rates for each analyte were obtained prior to each spot analysis and subtracted from the raw count rate for each analyte. Temperature was calculated from the Ti-in-zircon thermometer (Watson et al. 2006). Because we have no constraints on the activity of  $\text{TiO}_2$  in the magma, an average value in crustal rocks of 0.6 was used.

For U-Pb dates, instrumental fractionation of the background-subtracted ratios was corrected and dates were calibrated with respect to interspersed measurements of the Plesovice zircon standard (Slama et al. 2008). Two analyses of Plesovice were done for every 10 analyses of unknown zircon. Signals at mass 204 were indistinguishable from zero following subtraction of mercury backgrounds measured during the gas blank ( $<1000 \text{ cps } ^{202}\text{Hg}$ ), and thus dates are reported without common Pb correction. Radiogenic isotope ratio and age error propagation for each analysis includes uncertainty contributions from counting statistics and background subtraction. For concentration calculations, background-subtracted count rates for each analyte were internally normalized to  $^{29}\text{Si}$  and calibrated with respect to NIST SRM-610 and -612 glasses as the primary standards.

Age interpretations are based  $^{206}\text{Pb}/^{238}\text{U}$  dates. Analyses that intersected inclusions during ablation are not included in plots or interpretations of zircon chemistry, but they are used for age interpretation because the inclusions appear to have no U or Pb. These analyses were identified by time-resolved data that show large fluctuations in Ti or P, showing that accessory mineral inclusions likely are ilmenite, rutile, titanite, apatite, or xenotime. Errors on the dates from individual LA-ICPMS analyses are given at  $2\sigma$  and do not include the standard calibration uncertainty. A weighted mean  $^{206}\text{Pb}/^{238}\text{U}$  date is calculated using Isoplot 3.0 (Ludwig 2003). The error is given at the 95% confidence interval and includes the standard calibration uncertainty of 0.88% ( $2\sigma$ ).

Two zircon standards were measured as unknowns to assess accuracy, interspersed as groups of two analyses for every 20 unknown analyses. AUSZ2 zircon (38.9 Ma from unpublished chemical abrasion thermal ionization mass spectrometry (CA-TIMS) data, Boise State University) yielded a weighted mean  $^{206}\text{Pb}/^{238}\text{U}$  date of  $38.5 \pm 0.7$  (MSWD=1.8,  $n=10$ ). R33 zircon (419 Ma from unpublished chemical abrasion thermal ionization mass spectrometry (CA-TIMS) data, Boise State University) yielded a weighted mean  $^{206}\text{Pb}/^{238}\text{U}$  date of  $415 \pm 10$  (MSWD=1.7,  $n=6$ ). Errors include the standard calibration uncertainty of 0.88% ( $2\sigma$ ).

## U-PB GEOCHRONOLOGY RESULTS

Twenty-one spots from SCARTF yielded a weighted mean  $^{206}\text{Pb}/^{238}\text{U}$  date of  $27.17 \pm 0.54$  Ma (MSWD = 1.3).

FIGURE S1. Cathodoluminescence images of zircons from Scarritt Pocket Tuff (SCARTF) showing analytical spots. Data in Supplementary Table 1S.

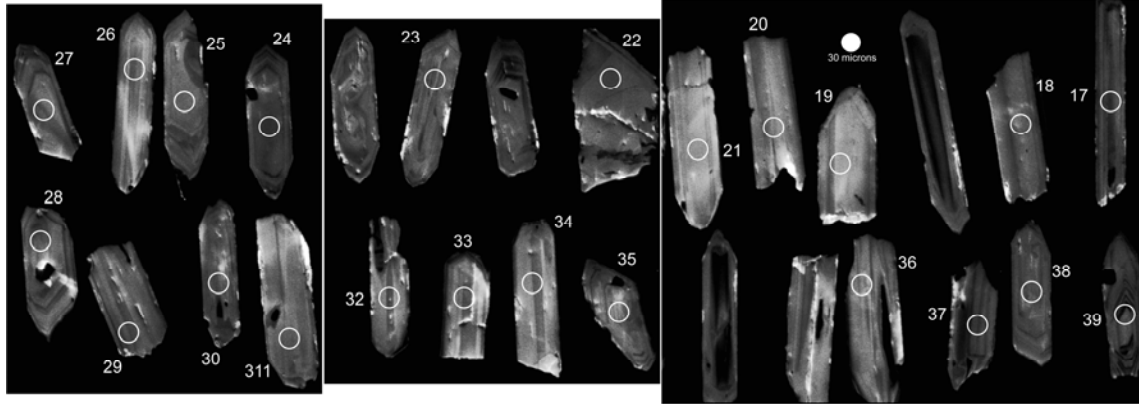

FIGURE S2.  $^{206}\text{Pb}/^{238}\text{U}$  dates for LA-ICP-MS spot analyses of zircon from Scarritt Pocket Tuff, rank-ordered according to apparent age. Each bar is an individual analysis and the sizes of vertical bars are  $\pm 2\sigma$ . Gray band shows mean age  $\pm 2\text{s.e.}$

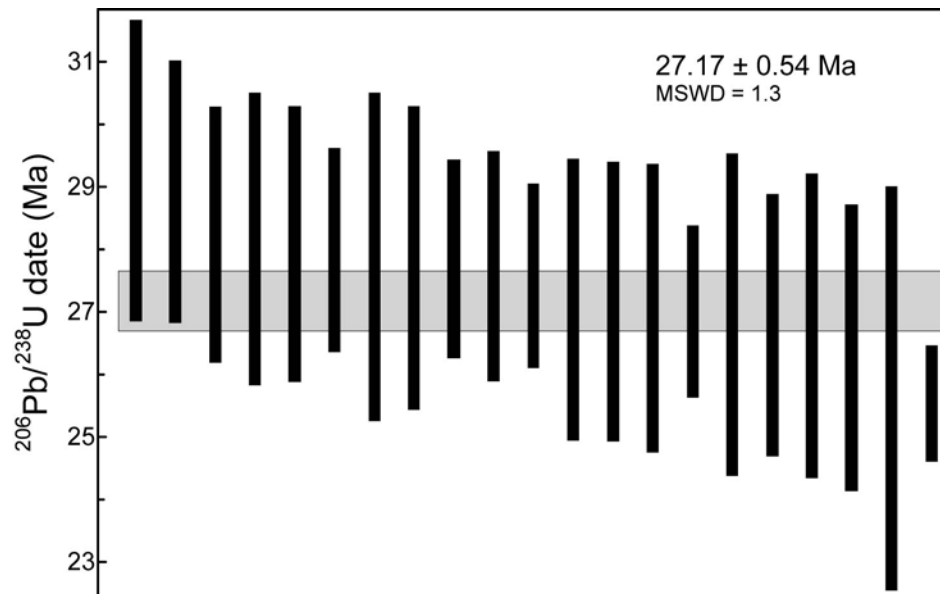

#### LITERATURE CITED

- Ludwig, K.R. 2003. Isoplot 3.00: A geochronological toolkit for Microsoft Excel. Berkeley Geochronology Center Special Publications. 4.
- Slama, J., J. Kosler, D. J. Condon, J. L. Crowley, A. Gerdes, J. M. Hanchar, M. S. A. Horstwood, G. A. Morris, L. Nasdala, N. Norberg, U. Schaltegger, B. Schoene, M. N. Tubrett, and M. J. Whitehouse. 2008. Plesovice zircon - A new natural reference material for U-Pb and Hf isotopic microanalysis. *Chemical Geology*. 151: 1-35.
- Watson, E. B., D. A. Wark, and J. B. Thomas. 2006. Crystallization thermometers for zircon and rutile. *Contributions to Mineralogy and Petrology*. 151: 413-433.

TABLE S1. U-Pb geochronologic analyses and trace element concentrations of Scarritt Pocket Tuff zircons.

| Analysis                      | U<br>ppm | Th<br>ppm | Pb*<br>ppm | Th/U | $\frac{^{206}\text{Pb}}{^{204}\text{Pb}}$ | $\frac{^{208}\text{Pb}^*}{^{232}\text{Th}}$ | $\pm 2s$<br>(%) | $\frac{^{206}\text{Pb}^*}{^{207}\text{Pb}^*}$ | $\pm 2s$<br>(%) | $\frac{^{207}\text{Pb}^*}{^{235}\text{U}^*}$ | $\pm 2s$<br>(%) |
|-------------------------------|----------|-----------|------------|------|-------------------------------------------|---------------------------------------------|-----------------|-----------------------------------------------|-----------------|----------------------------------------------|-----------------|
| SCARTF 27                     | 55.5     | 36.7      | 0.26       | 0.66 | 231.1                                     | 0.0023                                      | 21.7            | 8.9                                           | 116.5           | 0.0696                                       | 116.8           |
| SCARTF 31                     | 57.7     | 59.1      | -1.26      | 1.02 | 18.6                                      | 0.0013                                      | 15.9            | 7.7                                           | 168.4           | 0.0784                                       | 168.6           |
| SCARTF 22                     | 32.9     | 32.1      | -0.90      | 0.98 | 15.5                                      | 0.0024                                      | 24.4            | 20.5                                          | 79.2            | 0.0295                                       | 79.6            |
| SCARTF 29                     | 50.0     | 54.2      | -2.50      | 1.08 | 8.4                                       | 0.0020                                      | 16.5            | 15.3                                          | 44.4            | 0.0394                                       | 45.1            |
| SCARTF 33                     | 54.1     | 56.5      | -0.48      | 1.04 | 28.7                                      | 0.0018                                      | 15.7            | 17.8                                          | 59.2            | 0.0336                                       | 59.5            |
| SCARTF 26                     | 53.0     | 45.4      | -1.33      | 0.86 | 17.6                                      | 0.0021                                      | 13.5            | 27.1                                          | 92.8            | 0.0221                                       | 93.3            |
| SCARTF 23                     | 46.4     | 37.3      | -2.91      | 0.80 | 8.5                                       | 0.0021                                      | 17.1            | 8.0                                           | 87.6            | 0.0748                                       | 88.1            |
| SCARTF 30                     | 195.2    | 409.4     | 0.76       | 2.10 | 92.7                                      | 0.0016                                      | 9.7             | 23.6                                          | 20.6            | 0.0253                                       | 21.4            |
| SCARTF 19                     | 35.8     | 38.2      | -2.37      | 1.07 | 8.2                                       | 0.0015                                      | 24.8            | 11.5                                          | 19.7            | 0.0515                                       | 20.8            |
| SCARTF 36                     | 39.0     | 31.5      | -0.81      | 0.81 | 50.8                                      | 0.0020                                      | 26.7            | 20.7                                          | 76.5            | 0.0282                                       | 76.9            |
| SCARTF 38                     | 49.6     | 45.9      | -1.20      | 0.92 | 16.8                                      | 0.0013                                      | 23.1            | 24.7                                          | 40.1            | 0.0234                                       | 41.0            |
| SCARTF 39                     | 352.2    | 267.1     | 0.91       | 0.76 | 122.7                                     | 0.0014                                      | 10.7            | 23.2                                          | 14.8            | 0.0250                                       | 15.7            |
| SCARTF 34                     | 38.1     | 37.2      | -0.42      | 0.98 | 22.9                                      | 0.0015                                      | 27.5            | 67.3                                          | 63.2            | 0.0086                                       | 63.9            |
| SCARTF 28                     | 46.9     | 30.1      | -1.62      | 0.64 | 13.5                                      | 0.0021                                      | 22.7            | 20.9                                          | 58.0            | 0.0274                                       | 58.7            |
| SCARTF 32                     | 51.1     | 64.0      | -2.22      | 1.25 | 9.1                                       | 0.0020                                      | 21.7            | 15.0                                          | 112.5           | 0.0378                                       | 112.9           |
| SCARTF 25                     | 20.4     | 13.5      | -1.57      | 0.66 | 6.5                                       | 0.0031                                      | 30.4            | -13.8                                         | 99.4            | -0.0399                                      | 100.2           |
| contains Ti-bearing inclusion |          |           |            |      |                                           |                                             |                 |                                               |                 |                                              |                 |
| SCARTF 20                     | 68.5     | 85.5      | -3.14      | 1.25 | 12.0                                      | 0.0026                                      | 25.5            | 12.6                                          | 25.5            | 0.0497                                       | 26.8            |
| SCARTF 21                     | 72.6     | 86.2      | -2.39      | 1.19 | 13.3                                      | 0.0015                                      | 16.7            | 15.9                                          | 29.5            | 0.0371                                       | 29.9            |
| SCARTF 24                     | 64.7     | 45.5      | -0.42      | 0.70 | 40.7                                      | 0.0018                                      | 20.5            | 13.2                                          | 121.6           | 0.0441                                       | 121.9           |
| contains P-bearing inclusion  |          |           |            |      |                                           |                                             |                 |                                               |                 |                                              |                 |
| SCARTF 35                     | 122.6    | 108.2     | 0.56       | 0.88 | 296.2                                     | 0.0015                                      | 16.0            | 19.8                                          | 32.0            | 0.0290                                       | 33.0            |
| SCARTF 37                     | 270.7    | 399.9     | 1.05       | 1.48 | 148.4                                     | 0.0013                                      | 8.1             | 24.3                                          | 20.9            | 0.0225                                       | 21.3            |

TABLE S1. (Continued)

| Analysis                      | U<br>ppm | Th<br>ppm | Pb*<br>ppm | Th/U | $\frac{^{206}\text{Pb}}{^{204}\text{Pb}}$ | $\frac{^{208}\text{Pb}^*}{^{232}\text{Th}}$ | $\pm 2s$<br>(%) | $\frac{^{206}\text{Pb}^*}{^{207}\text{Pb}^*}$ | $\pm 2s$<br>(%) | $\frac{^{207}\text{Pb}^*}{^{235}\text{U}^*}$ | $\pm 2s$<br>(%) |
|-------------------------------|----------|-----------|------------|------|-------------------------------------------|---------------------------------------------|-----------------|-----------------------------------------------|-----------------|----------------------------------------------|-----------------|
| Secondary reference materials |          |           |            |      |                                           |                                             |                 |                                               |                 |                                              |                 |
| AUS Z2 120                    | 179.7    | 90.3      | 0.06       | 0.50 | 107.3                                     | 0.0025                                      | 12.9            | 21.3                                          | 10.6            | 0.0374                                       | 11.1            |
| AUS Z2 121                    | 180.0    | 92.0      | 0.17       | 0.51 | 124.8                                     | 0.0021                                      | 10.3            | 21.3                                          | 14.0            | 0.0389                                       | 14.5            |
| AUS Z2 122                    | 179.9    | 87.7      | 0.54       | 0.49 | 139.3                                     | 0.0023                                      | 11.7            | 19.0                                          | 9.7             | 0.0440                                       | 10.4            |
| AUS Z2 123                    | 179.1    | 86.8      | 0.27       | 0.48 | 116.1                                     | 0.0021                                      | 10.9            | 20.6                                          | 14.5            | 0.0381                                       | 15.2            |
| AUS Z2 124                    | 180.7    | 90.1      | 0.46       | 0.50 | 102.5                                     | 0.0020                                      | 9.6             | 21.6                                          | 12.5            | 0.0394                                       | 13.1            |
| AUS Z2 125                    | 181.5    | 91.4      | -0.20      | 0.50 | 60.2                                      | 0.0024                                      | 16.1            | 18.2                                          | 14.0            | 0.0463                                       | 14.4            |
| AUS Z2 126                    | 200.0    | 101.8     | 0.54       | 0.51 | 67.3                                      | 0.0018                                      | 8.4             | 21.9                                          | 10.3            | 0.0376                                       | 10.7            |
| AUS Z2 127                    | 203.6    | 104.0     | 0.40       | 0.51 | 53.9                                      | 0.0022                                      | 8.9             | 19.6                                          | 8.1             | 0.0422                                       | 9.0             |
| AUS Z2 128                    | 202.2    | 103.4     | 0.97       | 0.51 | 91.3                                      | 0.0023                                      | 10.0            | 19.6                                          | 10.5            | 0.0423                                       | 11.2            |
| AUS Z2 129                    | 202.5    | 104.0     | 1.06       | 0.51 | 136.8                                     | 0.0020                                      | 6.9             | 22.2                                          | 9.5             | 0.0379                                       | 10.2            |
| R33 130                       | 104.1    | 99.3      | 6.21       | 0.95 | 251.3                                     | 0.0180                                      | 4.9             | 17.1                                          | 3.8             | 0.5312                                       | 5.3             |
| R33 131                       | 150.1    | 138.6     | 9.15       | 0.92 | 232.0                                     | 0.0187                                      | 3.8             | 18.1                                          | 2.9             | 0.5164                                       | 4.0             |
| R33 132                       | 114.0    | 101.4     | 6.78       | 0.89 | 547.5                                     | 0.0197                                      | 3.6             | 18.5                                          | 4.5             | 0.5103                                       | 5.9             |
| R33 133                       | 115.4    | 103.4     | 6.61       | 0.90 | 484.5                                     | 0.0195                                      | 3.8             | 17.6                                          | 3.3             | 0.5203                                       | 4.5             |
| R33 134                       | 113.2    | 100.2     | 5.53       | 0.89 | 4338.8                                    | 0.0196                                      | 3.7             | 17.9                                          | 2.9             | 0.5047                                       | 4.3             |
| R33 135                       | 108.7    | 96.8      | 5.38       | 0.89 | 632.2                                     | 0.0190                                      | 3.3             | 17.6                                          | 4.3             | 0.5037                                       | 5.9             |

TABLE S1. (Continued)

| Analysis                      | $\frac{^{206}\text{Pb}^*}{^{238}\text{U}}$ | $\pm 2\text{s}$<br>(%) | error<br>corr. | $\frac{^{238}\text{U}}{^{206}\text{Pb}^*}$ | $\pm 2\text{s}$<br>(%) | $\frac{^{207}\text{Pb}^*}{^{206}\text{Pb}^*}$ | $\pm 2\text{s}$<br>(%) | error<br>corr. |
|-------------------------------|--------------------------------------------|------------------------|----------------|--------------------------------------------|------------------------|-----------------------------------------------|------------------------|----------------|
| SCARTF 27                     | 0.00450                                    | 7.3                    | 0.06           | 222                                        | 7.3                    | 0.1124                                        | 116.5                  | 0.00           |
| SCARTF 31                     | 0.00439                                    | 7.3                    | 0.04           | 228                                        | 7.3                    | 0.1295                                        | 168.4                  | 0.00           |
| SCARTF 22                     | 0.00438                                    | 8.3                    | 0.10           | 228                                        | 8.3                    | 0.0489                                        | 79.2                   | 0.00           |
| SCARTF 29                     | 0.00437                                    | 7.9                    | 0.17           | 229                                        | 7.9                    | 0.0655                                        | 44.4                   | 0.00           |
| SCARTF 33                     | 0.00435                                    | 5.9                    | 0.10           | 230                                        | 5.9                    | 0.0561                                        | 59.2                   | 0.00           |
| SCARTF 26                     | 0.00433                                    | 9.5                    | 0.10           | 231                                        | 9.5                    | 0.0369                                        | 92.8                   | 0.00           |
| SCARTF 23                     | 0.00433                                    | 8.7                    | 0.10           | 231                                        | 8.7                    | 0.1253                                        | 87.6                   | 0.00           |
| SCARTF 30                     | 0.00433                                    | 5.7                    | 0.27           | 231                                        | 5.7                    | 0.0424                                        | 20.6                   | 0.00           |
| SCARTF 19                     | 0.00431                                    | 6.7                    | 0.32           | 232                                        | 6.7                    | 0.0866                                        | 19.7                   | 0.00           |
| SCARTF 36                     | 0.00423                                    | 8.3                    | 0.11           | 237                                        | 8.3                    | 0.0484                                        | 76.5                   | 0.00           |
| SCARTF 38                     | 0.00421                                    | 8.6                    | 0.21           | 238                                        | 8.6                    | 0.0404                                        | 40.1                   | 0.00           |
| SCARTF 39                     | 0.00420                                    | 5.1                    | 0.33           | 238                                        | 5.1                    | 0.0432                                        | 14.8                   | 0.00           |
| SCARTF 34                     | 0.00419                                    | 9.6                    | 0.15           | 239                                        | 9.6                    | 0.0149                                        | 63.2                   | 0.00           |
| SCARTF 28                     | 0.00416                                    | 9.1                    | 0.16           | 240                                        | 9.1                    | 0.0478                                        | 58.0                   | 0.00           |
| SCARTF 32                     | 0.00411                                    | 8.7                    | 0.08           | 244                                        | 8.7                    | 0.0667                                        | 112.5                  | 0.00           |
| SCARTF 25                     | 0.00400                                    | 12.6                   | 0.13           | 250                                        | 12.6                   | -0.0723                                       | 99.4                   | 0.00           |
| contains Ti-bearing inclusion |                                            |                        |                |                                            |                        |                                               |                        |                |
| SCARTF 20                     | 0.00455                                    | 8.3                    | 0.31           | 220                                        | 8.3                    | 0.0793                                        | 25.5                   | 0.00           |
| SCARTF 21                     | 0.00429                                    | 5.4                    | 0.18           | 233                                        | 5.4                    | 0.0629                                        | 29.5                   | 0.00           |
| SCARTF 24                     | 0.00422                                    | 8.3                    | 0.07           | 237                                        | 8.3                    | 0.0758                                        | 121.6                  | 0.00           |
| contains P-bearing inclusion  |                                            |                        |                |                                            |                        |                                               |                        |                |
| SCARTF 35                     | 0.00416                                    | 7.9                    | 0.24           | 240                                        | 7.9                    | 0.0505                                        | 32.0                   | 0.00           |
| SCARTF 37                     | 0.00397                                    | 3.6                    | 0.17           | 252                                        | 3.6                    | 0.0411                                        | 20.9                   | 0.00           |

TABLE S1. (Continued)

| Analysis                      | $\frac{^{206}\text{Pb}^*}{^{238}\text{U}}$ | $\pm 2s$<br>(%) | error<br>corr. | $\frac{^{238}\text{U}}{^{206}\text{Pb}^*}$ | $\pm 2s$<br>(%) | $\frac{^{207}\text{Pb}^*}{^{206}\text{Pb}^*}$ | $\pm 2s$<br>(%) | error<br>corr. |
|-------------------------------|--------------------------------------------|-----------------|----------------|--------------------------------------------|-----------------|-----------------------------------------------|-----------------|----------------|
| Secondary reference materials |                                            |                 |                |                                            |                 |                                               |                 |                |
| AUS Z2 120                    | 0.00577                                    | 3.2             | 0.29           | 173                                        | 3.2             | 0.0470                                        | 10.6            | 0.00           |
| AUS Z2 121                    | 0.00601                                    | 3.6             | 0.25           | 166                                        | 3.6             | 0.0469                                        | 14.0            | 0.00           |
| AUS Z2 122                    | 0.00604                                    | 3.7             | 0.36           | 165                                        | 3.7             | 0.0528                                        | 9.7             | 0.00           |
| AUS Z2 123                    | 0.00570                                    | 4.4             | 0.29           | 176                                        | 4.4             | 0.0485                                        | 14.5            | 0.00           |
| AUS Z2 124                    | 0.00616                                    | 3.7             | 0.29           | 162                                        | 3.7             | 0.0464                                        | 12.5            | 0.00           |
| AUS Z2 125                    | 0.00610                                    | 3.6             | 0.25           | 164                                        | 3.6             | 0.0551                                        | 14.0            | 0.00           |
| AUS Z2 126                    | 0.00598                                    | 3.0             | 0.28           | 167                                        | 3.0             | 0.0456                                        | 10.3            | 0.00           |
| AUS Z2 127                    | 0.00598                                    | 3.8             | 0.42           | 167                                        | 3.8             | 0.0511                                        | 8.1             | 0.00           |
| AUS Z2 128                    | 0.00603                                    | 3.9             | 0.34           | 166                                        | 3.9             | 0.0509                                        | 10.5            | 0.00           |
| AUS Z2 129                    | 0.00610                                    | 3.6             | 0.35           | 164                                        | 3.6             | 0.0450                                        | 9.5             | 0.00           |
| R33 130                       | 0.06574                                    | 3.7             | 0.70           | 15                                         | 3.7             | 0.0586                                        | 3.8             | 0.00           |
| R33 131                       | 0.06785                                    | 2.7             | 0.68           | 15                                         | 2.7             | 0.0552                                        | 2.9             | 0.00           |
| R33 132                       | 0.06865                                    | 3.9             | 0.66           | 15                                         | 3.9             | 0.0539                                        | 4.5             | 0.00           |
| R33 133                       | 0.06659                                    | 3.1             | 0.69           | 15                                         | 3.1             | 0.0567                                        | 3.3             | 0.00           |
| R33 134                       | 0.06567                                    | 3.1             | 0.74           | 15                                         | 3.1             | 0.0557                                        | 2.9             | 0.00           |
| R33 135                       | 0.06425                                    | 4.1             | 0.69           | 16                                         | 4.1             | 0.0569                                        | 4.3             | 0.00           |



TABLE S1. (Continued)

| Analysis                             | $\frac{^{207}\text{Pb}^*}{^{206}\text{Pb}^*}$ | $\pm 2s$<br>(Ma) | $\frac{^{207}\text{Pb}^*}{^{235}\text{U}}$ | $\pm 2s$<br>(Ma) | $\frac{^{206}\text{Pb}^*}{^{238}\text{U}^*}$ | $\pm 2s$<br>(Ma) | P   | Ti     | Y    | Zr (wt%) | Nb   | Hf    | Ta   | Ti-in-zircon<br>T(°C) |
|--------------------------------------|-----------------------------------------------|------------------|--------------------------------------------|------------------|----------------------------------------------|------------------|-----|--------|------|----------|------|-------|------|-----------------------|
| SCARTF 27                            |                                               |                  | 68                                         | 77               | 28.9                                         | 2.1              | 266 | 3.3    | 831  | 56.1     | 0.56 | 9653  | 0.30 | 670                   |
| SCARTF 31                            | 2091                                          | 2961             | 77                                         | 124              | 28.2                                         | 2.0              | 318 | 9.7    | 2014 | 57.5     | 0.76 | 7733  | 0.36 | 764                   |
| SCARTF 22                            | 141                                           | 1860             | 30                                         | 23               | 28.2                                         | 2.3              | 273 | 11.3   | 1276 | 57.8     | 0.73 | 8244  | 0.27 | 780                   |
| SCARTF 29                            | 789                                           | 931              | 39                                         | 17               | 28.1                                         | 2.2              | 268 | 9.3    | 2066 | 56.8     | 0.70 | 8086  | 0.34 | 760                   |
| SCARTF 33                            | 456                                           | 1314             | 34                                         | 20               | 28.0                                         | 1.6              | 287 | 12.3   | 2150 | 57.9     | 1.02 | 7731  | 0.62 | 788                   |
| SCARTF 26                            | -563                                          | 2503             | 22                                         | 20               | 27.9                                         | 2.6              | 370 | 8.3    | 1295 | 55.4     | 0.90 | 7430  | 0.44 | 749                   |
| SCARTF 23                            | 2033                                          | 1551             | 73                                         | 62               | 27.9                                         | 2.4              | 244 | 4.3    | 975  | 56.3     | 0.82 | 8717  | 0.40 | 691                   |
| SCARTF 30                            | -204                                          | 517              | 25                                         | 5                | 27.8                                         | 1.6              | 589 | 9.7    | 2929 | 55.8     | 1.70 | 7599  | 0.34 | 764                   |
| SCARTF 19                            | 1352                                          | 380              | 51                                         | 10               | 27.7                                         | 1.8              | 242 | 9.6    | 1576 | 58.5     | 0.58 | 8811  | 0.35 | 763                   |
| SCARTF 36                            | 117                                           | 1803             | 28                                         | 21               | 27.2                                         | 2.3              | 261 | 6.8    | 1068 | 56.3     | 0.45 | 8328  | 0.23 | 731                   |
| SCARTF 38                            | -325                                          | 1029             | 24                                         | 10               | 27.1                                         | 2.3              | 291 | 5.1    | 949  | 63.3     | 0.70 | 10361 | 0.34 | 705                   |
| SCARTF 39                            | -158                                          | 369              | 25                                         | 4                | 27.0                                         | 1.4              | 860 | 7.4    | 3896 | 64.0     | 8.62 | 11800 | 2.52 | 738                   |
| SCARTF 34                            | -4222                                         | 4156             | 9                                          | 6                | 26.9                                         | 2.6              | 224 | 8.2    | 1237 | 57.2     | 0.63 | 7579  | 0.28 | 749                   |
| SCARTF 28                            | 91                                            | 1374             | 27                                         | 16               | 26.8                                         | 2.4              | 229 | 7.1    | 752  | 56.1     | 1.14 | 8540  | 0.57 | 735                   |
| SCARTF 32                            | 829                                           | 2347             | 38                                         | 42               | 26.4                                         | 2.3              | 279 | 8.7    | 2083 | 56.9     | 0.88 | 8139  | 0.34 | 753                   |
| SCARTF 25                            | 0                                             |                  | -41                                        | -42              | 25.8                                         | 3.2              | 155 | 4.1    | 348  | 56.1     | 0.19 | 8264  | 0.14 | 687                   |
| contains Ti-<br>bearing<br>inclusion |                                               |                  |                                            |                  |                                              |                  |     |        |      |          |      |       |      |                       |
| SCARTF 20                            | 1179                                          | 504              | 49                                         | 13               | 29.3                                         | 2.4              | 346 | 28.2   | 2454 | 56.4     | 1.22 | 7594  | 0.58 | 880                   |
| SCARTF 21                            | 703                                           | 627              | 37                                         | 11               | 27.6                                         | 1.5              | 317 | 53.8   | 2513 | 60.4     | 1.43 | 8127  | 0.61 | 963                   |
| SCARTF 24                            | 1089                                          | 2437             | 44                                         | 52               | 27.2                                         | 2.2              | 294 | 3056.4 | 744  | 57.9     | 2.35 | 8393  | 0.26 | 1982                  |

TABLE S1. (Continued)

| Analysis                         | $\frac{^{207}\text{Pb}^*}{^{206}\text{Pb}^*}$ | $\pm 2s$<br>(Ma) | $\frac{^{207}\text{Pb}^*}{^{235}\text{U}}$ | $\pm 2s$<br>(Ma) | $\frac{^{206}\text{Pb}^*}{^{238}\text{U}^*}$ | $\pm 2s$<br>(Ma) | P<br>ppm | Ti<br>ppm | Y<br>ppm | Zr<br>wt% | Nb<br>ppm | Hf<br>ppm | Ta<br>ppm | Ti-in-<br>zircon<br>T(°C) |
|----------------------------------|-----------------------------------------------|------------------|--------------------------------------------|------------------|----------------------------------------------|------------------|----------|-----------|----------|-----------|-----------|-----------|-----------|---------------------------|
| contains P-bearing<br>inclusion  |                                               |                  |                                            |                  |                                              |                  |          |           |          |           |           |           |           |                           |
| SCARTF 35                        | 217                                           | 741              | 29                                         | 9                | 26.8                                         | 2.1              | 576      | 6.8       | 1709     | 56.5      | 2.32      | 9434      | 0.94      | 731                       |
| SCARTF 37                        | -282                                          | 533              | 23                                         | 5                | 25.5                                         | 0.9              | 759      | 11.8      | 4474     | 59.5      | 2.37      | 7267      | 0.62      | 784                       |
| Secondary<br>reference materials |                                               |                  |                                            |                  |                                              |                  |          |           |          |           |           |           |           |                           |
| AUS Z2 120                       | 51                                            | 253              | 37                                         | 4                | 37.1                                         | 1.2              | 110      | 2.3       | 951      | 61.1      | 4.15      | 4607      | 2.25      | 640                       |
| AUS Z2 121                       | 42                                            | 335              | 39                                         | 6                | 38.7                                         | 1.4              | 111      | 2.6       | 971      | 60.9      | 4.26      | 4595      | 2.27      | 649                       |
| AUS Z2 122                       | 319                                           | 221              | 44                                         | 4                | 38.8                                         | 1.4              | 105      | 1.8       | 937      | 62.6      | 3.85      | 4689      | 2.09      | 622                       |
| AUS Z2 123                       | 122                                           | 343              | 38                                         | 6                | 36.6                                         | 1.6              | 101      | 2.7       | 914      | 60.2      | 3.66      | 4592      | 2.00      | 652                       |
| AUS Z2 124                       | 18                                            | 301              | 39                                         | 5                | 39.6                                         | 1.5              | 102      | 2.7       | 932      | 61.9      | 4.03      | 4845      | 2.16      | 652                       |
| AUS Z2 125                       | 414                                           | 312              | 46                                         | 6                | 39.2                                         | 1.4              | 111      | 2.4       | 943      | 61.5      | 3.88      | 4854      | 2.08      | 645                       |
| AUS Z2 126                       | -25                                           | 249              | 37                                         | 4                | 38.4                                         | 1.1              | 125      | 3.0       | 1011     | 61.5      | 4.56      | 4750      | 2.49      | 661                       |
| AUS Z2 127                       | 248                                           | 187              | 42                                         | 4                | 38.4                                         | 1.5              | 95       | 1.3       | 1031     | 61.6      | 4.82      | 4768      | 2.42      | 602                       |
| AUS Z2 128                       | 238                                           | 243              | 42                                         | 5                | 38.7                                         | 1.5              | 121      | 2.0       | 1031     | 61.4      | 4.39      | 4752      | 2.19      | 630                       |
| AUS Z2 129                       | -57                                           | 232              | 38                                         | 4                | 39.2                                         | 1.4              | 122      | 2.1       | 1043     | 61.6      | 4.55      | 4786      | 2.39      | 634                       |
| R33 130                          | 552                                           | 83               | 433                                        | 19               | 410                                          | 15               | 138      | 6.7       | 1749     | 68.3      | 0.15      | 11513     | 0.20      | 729                       |
| R33 131                          | 420                                           | 65               | 423                                        | 14               | 423                                          | 11               | 139      | 5.5       | 1695     | 66.7      | 0.05      | 11101     | 0.20      | 712                       |
| R33 132                          | 367                                           | 100              | 419                                        | 20               | 428                                          | 16               | 151      | 6.2       | 1646     | 65.6      | 0.15      | 11097     | 0.19      | 723                       |
| R33 133                          | 479                                           | 72               | 425                                        | 16               | 416                                          | 12               | 166      | 6.8       | 1771     | 67.0      | 0.24      | 11211     | 0.16      | 731                       |
| R33 134                          | 442                                           | 64               | 415                                        | 14               | 410                                          | 12               | 159      | 6.9       | 1727     | 65.7      | 0.12      | 11168     | 0.14      | 732                       |
| R33 135                          | 486                                           | 94               | 414                                        | 20               | 401                                          | 16               | 146      | 6.8       | 1686     | 66.1      | 0.22      | 11037     | 0.20      | 731                       |

TABLE S1. (Continued)

| Analysis                      | La<br>ppm | Ce<br>ppm | Pr<br>ppm | Nd<br>ppm | Sm<br>ppm | Eu<br>ppm | Gd<br>ppm | Tb<br>ppm | Dy<br>ppm | Ho<br>ppm | Er<br>ppm | Tm<br>ppm | Yb<br>ppm |
|-------------------------------|-----------|-----------|-----------|-----------|-----------|-----------|-----------|-----------|-----------|-----------|-----------|-----------|-----------|
| SCARTF 27                     |           | 5.9       | 0.02      | 1.2       | 3.8       | 1.1       | 18        | 6.8       | 79        | 29        | 132       | 36        | 444       |
| SCARTF 31                     |           | 11.0      | 0.20      | 4.6       | 11.9      | 3.3       | 63        | 22.5      | 240       | 81        | 317       | 75        | 835       |
| SCARTF 22                     | 0.0005    | 6.9       | 0.10      | 3.2       | 7.4       | 1.7       | 36        | 13.9      | 145       | 48        | 199       | 46        | 548       |
| SCARTF 29                     | 0.0122    | 8.8       | 0.19      | 4.1       | 11.6      | 2.7       | 60        | 21.4      | 239       | 81        | 320       | 77        | 823       |
| SCARTF 33                     |           | 10.1      | 0.15      | 4.2       | 10.7      | 2.2       | 58        | 20.4      | 240       | 82        | 332       | 83        | 877       |
| SCARTF 26                     | 0.0495    | 7.5       | 0.10      | 2.2       | 5.8       | 1.8       | 30        | 11.0      | 133       | 48        | 201       | 54        | 632       |
| SCARTF 23                     |           | 6.1       | 0.14      | 2.5       | 5.8       | 2.4       | 26        | 8.6       | 103       | 35        | 148       | 39        | 491       |
| SCARTF 30                     | 0.0474    | 15.8      | 0.37      | 9.1       | 25.5      | 9.2       | 114       | 34.2      | 341       | 104       | 406       | 97        | 1084      |
| SCARTF 19                     | 0.0132    | 7.4       | 0.12      | 2.8       | 8.7       | 2.5       | 47        | 16.8      | 188       | 62        | 245       | 60        | 642       |
| SCARTF 36                     |           | 5.3       | 0.08      | 1.4       | 4.9       | 1.2       | 29        | 9.5       | 118       | 40        | 168       | 43        | 514       |
| SCARTF 38                     | 0.0006    | 6.1       | 0.11      | 1.7       | 4.1       | 1.2       | 25        | 8.7       | 102       | 36        | 145       | 39        | 456       |
| SCARTF 39                     | 0.0152    | 23.1      | 0.08      | 2.1       | 10.3      | 2.9       | 75        | 31.8      | 407       | 148       | 611       | 153       | 1752      |
| SCARTF 34                     |           | 6.7       | 0.12      | 3.5       | 8.1       | 2.3       | 35        | 11.4      | 131       | 47        | 184       | 47        | 565       |
| SCARTF 28                     | 0.0357    | 6.0       | 0.04      | 0.7       | 1.7       | 0.7       | 13        | 5.3       | 71        | 27        | 126       | 34        | 430       |
| SCARTF 32                     |           | 11.0      | 0.22      | 4.0       | 11.4      | 2.8       | 68        | 22.4      | 249       | 79        | 318       | 74        | 794       |
| SCARTF 25                     |           | 2.1       | 0.01      | 0.4       | 1.2       | 0.7       | 8         | 2.7       | 33        | 13        | 58        | 16        | 213       |
| contains Ti-bearing inclusion |           |           |           |           |           |           |           |           |           |           |           |           |           |
| SCARTF 20                     | 0.3369    | 14.0      | 0.31      | 4.3       | 12.2      | 2.9       | 72        | 23.5      | 266       | 91        | 370       | 91        | 973       |
| SCARTF 21                     | 0.0011    | 12.7      | 0.17      | 3.7       | 11.1      | 2.9       | 62        | 22.4      | 275       | 95        | 382       | 92        | 1004      |
| SCARTF 24                     | 0.0231    | 4.5       | 0.06      | 0.9       | 3.0       | 1.3       | 19        | 5.9       | 74        | 27        | 117       | 32        | 425       |
| contains P-bearing inclusion  |           |           |           |           |           |           |           |           |           |           |           |           |           |
| SCARTF 35                     | 0.7022    | 12.3      | 0.31      | 3.5       | 6.0       | 1.9       | 36        | 14.3      | 181       | 64        | 271       | 70        | 839       |
| SCARTF 37                     |           | 22.9      | 0.31      | 6.9       | 21.1      | 11.0      | 113       | 36.9      | 429       | 155       | 632       | 153       | 1734      |

TABLE S1. (Continued)

| Analysis                      | La<br>ppm | Ce<br>ppm | Pr<br>ppm | Nd<br>ppm | Sm<br>ppm | Eu<br>ppm | Gd<br>ppm | Tb<br>ppm | Dy<br>ppm | Ho<br>ppm | Er<br>ppm | Tm<br>ppm | Yb<br>ppm |
|-------------------------------|-----------|-----------|-----------|-----------|-----------|-----------|-----------|-----------|-----------|-----------|-----------|-----------|-----------|
| Secondary reference materials |           |           |           |           |           |           |           |           |           |           |           |           |           |
| AUS Z2 120                    | 0.0059    | 2.6       | 0.22      | 4.2       | 6.7       | 4.8       | 27        | 10.2      | 114       | 38        | 154       | 40        | 441       |
| AUS Z2 121                    | 0.0103    | 2.7       | 0.21      | 4.1       | 7.5       | 5.0       | 27        | 9.8       | 119       | 38        | 156       | 39        | 446       |
| AUS Z2 122                    |           | 2.7       | 0.26      | 3.8       | 7.1       | 5.1       | 26        | 9.8       | 114       | 37        | 152       | 39        | 438       |
| AUS Z2 123                    | 0.0308    | 2.5       | 0.18      | 3.2       | 7.0       | 4.9       | 26        | 9.4       | 111       | 36        | 150       | 38        | 430       |
| AUS Z2 124                    | 0.0301    | 2.8       | 0.26      | 3.7       | 6.9       | 4.8       | 26        | 9.9       | 117       | 37        | 151       | 41        | 454       |
| AUS Z2 125                    | 0.0004    | 2.6       | 0.24      | 3.3       | 7.3       | 5.3       | 25        | 10.1      | 118       | 40        | 152       | 40        | 442       |
| AUS Z2 126                    | 0.0229    | 3.0       | 0.27      | 4.3       | 7.6       | 5.6       | 30        | 11.1      | 130       | 40        | 168       | 42        | 487       |
| AUS Z2 127                    |           | 3.0       | 0.24      | 4.5       | 7.1       | 5.8       | 31        | 11.4      | 132       | 41        | 173       | 44        | 491       |
| AUS Z2 128                    |           | 3.0       | 0.27      | 4.4       | 8.3       | 5.7       | 29        | 11.3      | 125       | 42        | 165       | 43        | 472       |
| AUS Z2 129                    | 0.0147    | 3.0       | 0.29      | 4.3       | 6.8       | 5.8       | 29        | 11.3      | 130       | 42        | 168       | 44        | 490       |
| R33 130                       | 0.0173    | 3.9       | 0.06      | 2.1       | 7.0       | 1.5       | 37        | 14.1      | 172       | 63        | 274       | 70        | 771       |
| R33 131                       |           | 4.2       | 0.10      | 1.8       | 5.4       | 1.4       | 30        | 11.8      | 155       | 57        | 263       | 69        | 794       |
| R33 132                       |           | 3.9       | 0.05      | 1.6       | 5.1       | 1.3       | 31        | 12.8      | 161       | 59        | 259       | 70        | 765       |
| R33 133                       |           | 4.0       | 0.10      | 2.6       | 6.6       | 1.5       | 38        | 13.9      | 172       | 64        | 279       | 73        | 818       |
| R33 134                       | 0.0056    | 4.0       | 0.07      | 2.2       | 6.2       | 1.5       | 35        | 13.6      | 169       | 64        | 281       | 72        | 798       |
| R33 135                       | 0.0330    | 3.7       | 0.06      | 2.1       | 6.4       | 1.5       | 35        | 12.8      | 163       | 61        | 270       | 69        | 780       |
